# Supplementary material for: Persisting Vaccine Hesitancy in Africa: The Whys, Global Public Health Consequences and Ways-Out—COVID-19 Vaccination Acceptance Rates as Case-in-Point
Source: MDPI journal article supplement (doi:10.3390/vaccines10111934), 2022-11-15
Supplement: s1 [file s1]

**Table S1.** Extracted data on COVID-19 infection, fatality, case fatality and vaccination rates as at 25 October 2022 in the 20 African countries reviewed.

| Country      | Conformed       | Confirmed          | Case           | COVID-19 vaccination uptake rate (%) ** |                     |                   |
|--------------|-----------------|--------------------|----------------|-----------------------------------------|---------------------|-------------------|
|              | COVID-19 cases* | COVID-19 fatality* | fatality ratio | Full vaccination                        | Partial vaccination | Total vaccination |
| Cameroon     | 121,652         | 1,935              | 1.6            | 1.3                                     | 4.7                 | 6                 |
| Ethiopia     | 493,885         | 7,572              | 1.5            | 5.3                                     | 31                  | 36.3              |
| Somalia      | 27,223          | 1,361              | 5              | 7                                       | 29                  | 36                |
| Egypt        | 515,645         | 24,613             | 4.8            | 12                                      | 36                  | 48                |
| Tunisia      | 1,146,044       | 29,257             | 2.5            | 21                                      | 52                  | 73                |
| Morocco      | 1,265,396       | 16,280             | 1.3            | 4                                       | 63                  | 67                |
| Sudan        | 63,449          | 4,964              | 7.8            | 4.6                                     | 9.9                 | 14.5              |
| South Africa | 4,026,068       | 102,257            | 2.5            | 4.9                                     | 33                  | 37.9              |
| Zambia       | 333,644         | 4,017              | 1.2            | 3.2                                     | 9.6                 | 12.8              |
| Malawi       | 88,073          | 2,683              | 3.1            | 4                                       | 15                  | 19                |
| Zimbabwe     | 257,893         | 5,606              | 2.2            | 11                                      | 30                  | 41                |
| Botswana     | 326,344         | 2,790              | 0.9            | 8.2                                     | 53                  | 56.2              |
| Kenya        | 338,749         | 5,678              | 1.7            | 6.5                                     | 19                  | 25.5              |
| Uganda       | 169,396         | 3,628              | 2.2            | 13                                      | 28                  | 41                |
| Tanzania     | 39,679          | 845                | 2.2            | 3                                       | 34                  | 37                |
| Nigeria      | 266,043         | 3,155              | 1.2            | 6                                       | 20                  | 26                |
| Ghana        | 170,573         | 1,460              | 0.9            | 9.4                                     | 26                  | 35.4              |
| Burkina Faso | 21,631          | 387                | 1.8            | 2                                       | 12                  | 14                |
| Mali         | 32,719          | 742                | 2.3            | 2.4                                     | 8.8                 | 11.2              |
| Senegal      | 88,679          | 1,968              | 2.2            | 2.5                                     | 6.8                 | 9.3               |
| Average      | 489,639         | 11,060             | 2              | 6.6                                     | 26                  | 32.4              |

Sources: \* = <https://www.worldometers.info/coronavirus/> [21]; \*\* = <https://ourworldindata.org/coronavirus> [16]
